# Supplementary material for: Efficient photoelectrocatalytic performance of beta-cyclodextrin/graphene composite and effect of Cl−in water: degradation for bromophenol blue as a case study
Source: Royal Society of Chemistry journal article supplement (doi:10.1039/d1ra04533d), 2021-01-01
Supplement: d1ra04533d1.pdf [file d1ra04533d1.pdf]

**Supporting Information**

**Efficient photoelectrocatalytic performance of beta-cyclodextrin/graphene composite and effect of Cl<sup>-</sup> in water: Degradation for bromophenol blue as a case study**

Qiao Cong <sup>a,1</sup>, Miao Ren <sup>b,2</sup>, Tingting Zhang <sup>b,3</sup>, Fangyuan Cheng <sup>b,4</sup>, Jiao Qu <sup>b,\*</sup>

<sup>1</sup> Qiao Cong

congqiao@jlju.edu.cn

<sup>2</sup> Miao Ren

renm677@nenu.edu.cn

<sup>3</sup> Tingting Zhang

zhangtt671@nenu.edu.cn

<sup>4</sup> Fangyuan Cheng

Chengfy310@nenu.edu.cn

\* Jiao Qu

quj100@nenu.edu.cn

<sup>a</sup> School of Municipal and Environmental Engineering, Jilin Jianzhu University, Changchun 130118, China, Research Field: Environmental Chemistry.

<sup>b</sup> School of Environment, Northeast Normal University, NO. 2555 Jingyue Street, Changchun 130117, China, Research Field: Environmental Chemistry.

\* Corresponding author. Tel: +86 431 89165617. Fax: +86 431 89165610.

22 **Text S1 The preparation method of Graphene**

23 Bromophenol blue is not conductive, which is an acid-base indicator. Bromophenol blue is also called  
24 3',3'',5',5''-Tetrabromophenolsulfonephthalein, its molecular formula is  $C_{19}H_{10}Br_4O_5S$ , and the structural  
25 formula is shown in the **Fig. S1**.

26 **Text S2 The preparation method of Graphene**

27 10 g of the collected grass was cut, then the particles attached to the surface were removed by water, and  
28 mixed with 10 mL  $H_2O_2$ , 5 mL  $HNO_3$  and 5 mL  $H_2SO_4$  in the reactor. The reactor is a corrosion-resistant  
29 stainless steel lining reactor with a volume of 100 mL. The reactor was heated to 400 °C with a heating  
30 program of 10 °C  $min^{-1}$  to synthesize GA, and then kept at the temperature for 60 min. The naturally  
31 cooled reaction solution was filtered 3-5 times with glass filter paper (0.45  $\mu m$ ). Then, the residue  
32 containing GA was collected, washed 3 times with ethanol, and dried at 105 °C for 2 h.

33 **Text S3 Photoelectrocatalytic performance of graphene-based materials for the removal of organic**  
34 **pollutants**

35 GR-based photoelectrocatalysts are widely used to degrade organic pollutants. Xie et al.<sup>1</sup> used graphene  
36 oxide/ZnO nanorods to remove Methylene blue (MB) in aqueous solution, and the removal efficiency of  
37 MB was only 90% within 450  $min^{-2}$ . The researchers also used  $TiO_2$ -reduced graphene oxide to degrade  
38 BPA in water with degradation rate is 70.4%<sup>3</sup>. Meanwhile, the rGH-PANI/ $TiO_2$  hydrogel electrode  
39 reported by Cui<sup>4</sup> could completely degrade phenol in 300 min. Although, the  $TiO_2$ -rGH hydrogel  
40 electrode reported by Zhang<sup>5</sup> could completely degrade BPA in 300 min through the synergistic effect  
41 of adsorption and photo-electro-catalysis. But the poor use of visible light, low quantum yield, and the  
42 easier recombination of electrons and holes limits its application in catalysis. The results were shown in  
43 **Table S1**.

44

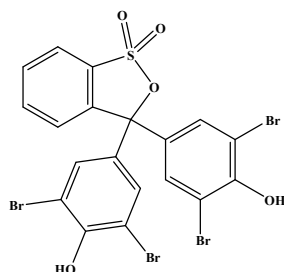

45

46

**Fig. S1 BPB structural formula**

47

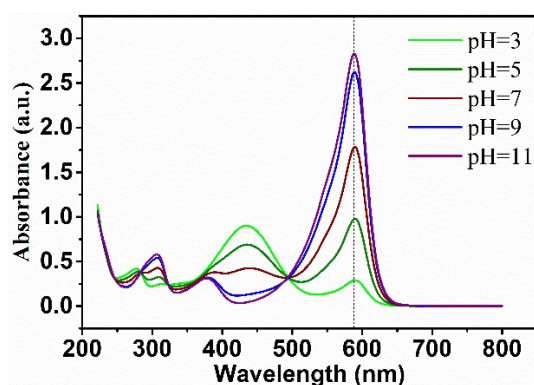

48

49

**Fig. S2 UV spectra for BPB at different pH**

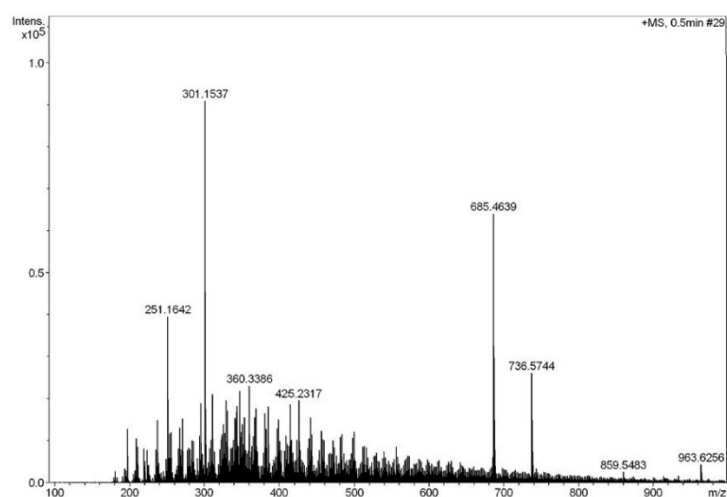

**Fig. S3** UPLC-MS/MS spectra of the degradation intermediates for BPB

**Table S1** Photoelectrocatalytic performance of graphene-based materials for the removal of organic pollutants

| Nanomaterial                             | Target molecule | Degradation efficiency | Time (min) | Cycles of use | Activity maintained | Refs.     |
|------------------------------------------|-----------------|------------------------|------------|---------------|---------------------|-----------|
| Graphene/ $\beta$ -cyclodextrin          | BPB             | 100%                   | 120        | 3             | 82.0%               | This work |
| Graphene oxide/ZnO nanorod               | MB              | 90%                    | 450        | -             | -                   | 1         |
| TiO <sub>2</sub> -Graphene               | MO              | 90%                    | 300        | 5             | 83%                 | 2         |
| TiO <sub>2</sub> -reduced graphene oxide | BPA             | 70.40%                 | 150        | -             | -                   | 3         |
| rGH-PANI/TiO <sub>2</sub> hydrogel       | phenol          | 100%                   | 420        | -             | -                   | 4         |
| TiO <sub>2</sub> -graphene hydrogel      | BPA             | 100%                   | 300        | -             | -                   | 5         |

57 **References**

- 58 1 J. Xie, Z. Ming, H. Li, H. Yang, B. Yu, R. Wu, X. Liu, Y. Bai and S.-T. J. C. Yang, 2016, **151**, 324-  
59 331.
- 60 2 B. Qiu, M. Xing and J. J. J. o. t. A. C. S. Zhang, 2014, **136**, 5852-5855.
- 61 3 L.-J. Luo, X.-J. Zhang, F.-J. Ma, A.-L. Zhang, L.-C. Bian, X.-J. Pan, F.-Z. J. R. K. Jiang, Mechanisms  
62 and Catalysis, 2015, **114**, 311-322.
- 63 4 W. Cui, J. He, H. Wang, J. Hu, L. Liu and Y. J. A. C. B. E. Liang, 2018, **232**, 232-245.
- 64 5 Y. Zhang, W. Cui, W. An, L. Liu, Y. Liang and Y. J. A. C. B. E. Zhu, 2018, **221**, 36-46.  
65
